# Supplementary material for: Enhanced electrochemical performance by alumina-coated graphite anodes via spray coating
Source: Royal Society of Chemistry journal article supplement (doi:10.1039/d4ya00582a), 2024-12-23
Supplement: d4ya00582a1.pdf [file d4ya00582a1.pdf]

## **Enhanced electrochemical performance by alumina-coated graphite anodes via spray coating**

Pin-Yi Zhao <sup>a,b,c,\*</sup>, Kwang-Leong Choy <sup>b,c,\*</sup>, Yongyi Song <sup>a</sup>, Shudong Zhang <sup>a</sup>, Rui Ma <sup>a</sup>

<sup>a</sup> SINOPEC (Dalian) Research Institute of Petroleum and Petrochemicals Co., Ltd., 116045,  
China

<sup>b</sup> Institute for Materials Discovery, University College London, WC1E 7JE, United Kingdom

<sup>c</sup> Department of Chemistry, University College London, WC1H 0AJ, United Kingdom

---

\*Corresponding author. E-mail address: [pinyi.zhao.18@ucl.ac.uk](mailto:pinyi.zhao.18@ucl.ac.uk) ; [k.choy@ucl.ac.uk](mailto:k.choy@ucl.ac.uk)

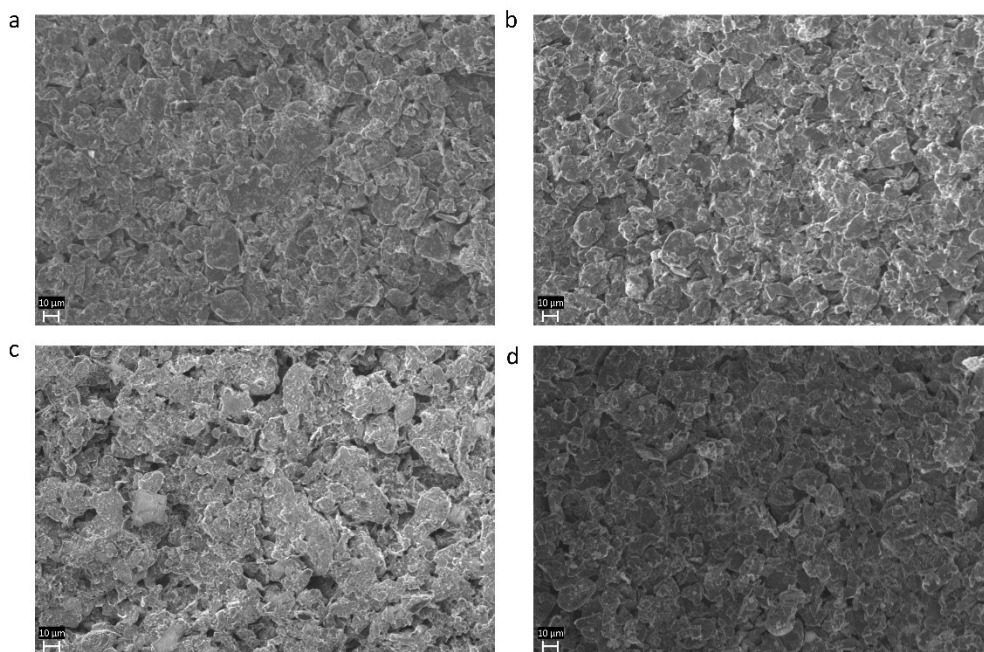

Figure S1 Scanning electron microscopy (SEM) of G0, G1, G4, and G7, respectively: (a) G0, (b) G1, (c) G4, and (d) G7
